# Supplementary material
Source: HighWire-hosted journal article supplement (https://www.genetics.org/content/suppl/2013/10/02/genetics.113.157370)
Supplement: genetics.113.157370-2.pdf [file genetics.113.157370-2.pdf]

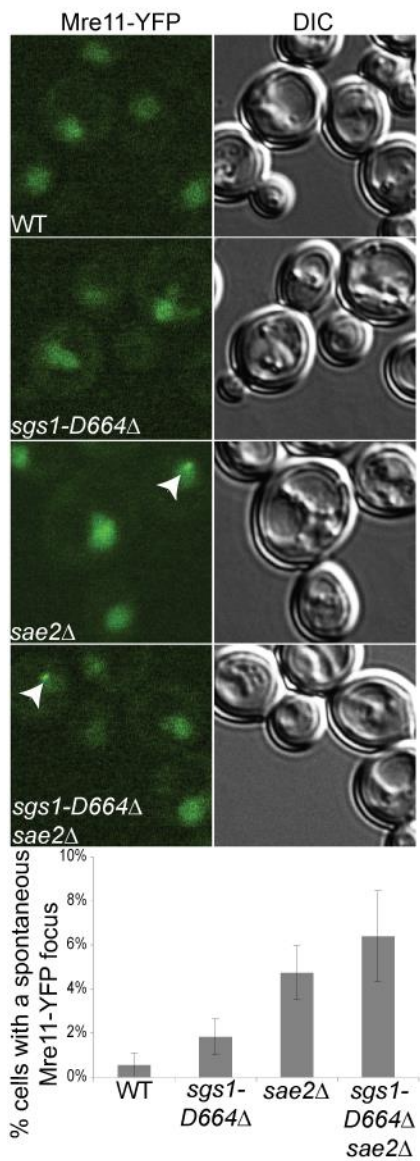

**Figure S4** More spontaneous Mre11 foci are observed in *sae2Δ* and *sae2Δ sgs1-D664Δ* cells. Cells expressing Mre11-YFP were analyzed in *WT*, *sgs1-D664Δ*, *sae2Δ*, and *sgs1-D664Δ sae2Δ* for formation of spontaneous Mre11 foci. For each strain, a single Z-stack is shown and the white arrowheads indicate a focus. Each experiment was done in triplicate with a total of 200-300 cells analyzed with standard errors plotted.
